# Supplementary material for: Electron-induced effect and coordinated pi-delocalization synergistically promote charge transfer in benzenesulfonic acid modified g-C3N4 with efficient photocatalytic performance
Source: Royal Society of Chemistry journal article supplement (doi:10.1039/d2cy01435a), 2022-01-01
Supplement: d2cy01435a1.pdf [file d2cy01435a1.pdf]

## Supporting Information

### **Electron induced effect and coordinated pi-delocalization synergistically promote charge transfer in benzenesulfonic acid modified g-C<sub>3</sub>N<sub>4</sub> with efficient photocatalytic performance**

Zhiling Xia<sup>a</sup>, Yunfeng Li<sup>a,\*</sup>, Qing Yang<sup>a</sup>, Wei Zhu<sup>a,\*</sup>, Renxi Jin<sup>b</sup>, Luohong Zhang<sup>a,\*</sup>, Yan Xing<sup>c</sup>

<sup>a</sup>College of Environmental and Chemical Engineering, Xi'an Key Laboratory of Textile Chemical Engineering Auxiliaries, Xi'an Polytechnic University, Xi'an 710000, PR China.

<sup>b</sup>Department of Chemical and Biomolecular Engineering, University of Notre Dame, Indiana 46556, USA.

<sup>c</sup>Jilin Provincial Key Laboratory of Advanced Energy Materials, Department of Chemistry, Northeast Normal University, Changchun 130024, PR China.

#### **1. Chemical reagents**

Urea (CH<sub>4</sub>N<sub>2</sub>O, 99%) and triethanolamine (TEOA, 78%) are purchased from Sinopharm Chemical Reagent Co., Ltd. Sulfanilic acid (C<sub>6</sub>H<sub>7</sub>NO<sub>3</sub>S 99.5%), p-Benzoquinone (C<sub>6</sub>H<sub>4</sub>O<sub>2</sub>, 99%) and Chloroplatinic acid (H<sub>2</sub>PtCl<sub>6</sub>·6H<sub>2</sub>O, 37.5%) are purchased from Shanghai Aladdin Biochemical Technology Co., Ltd. Tertiary butanol (C<sub>4</sub>H<sub>10</sub>O, AR) is purchased from Tianjin Comio Chemical Reagent Co., Ltd, Methanol (CH<sub>3</sub>OH, 99.9%) are purchased from Tianjin Fuchen Chemical Reagent Factory.

Reactive red 2 (99%) is purchased from Shanghai Maclean Biochemical Technology Co., Ltd. Polyvinylidene fluoride (PVDF) and N-methylpyrrolidone (NMP) are purchased from Guangdong Candlelight New Energy Technology Co., Ltd. All the chemical reagents in this study are used without any purification.

## 2. Characterization

X-ray diffraction (XRD) of the photocatalyst was carried out on a Dmax Rapid II diffractometer. Fourier transform infrared spectroscopy (FT-IR) was performed on a Spotlight 400 spectrometer. X-ray photoelectron spectroscopy (XPS) was performed using a Thermo Scientific K-Alpha XPS instrument with a standard monochromatic light source. Scanning electron microscopy (SEM) and energy-dispersive X-ray (EDX) elemental mapping were performed using an FEI Quanta 450 FEG microscope. Transmission electron microscopy (TEM) images and selected area electron diffraction (SAED) images were acquired using a JEM-2100F microscope. N<sub>2</sub> adsorption-desorption tests were obtained from a Micromeritics ASAP 2020 plus analyzer at 77.4 K. Solid-state <sup>13</sup>C magnetic resonance (NMR) spectroscopy was recorded using Bruker AVANCE III HD 400 MHz. Electrochemical impedance spectroscopy (EIS), Mott-Schottky analysis, and linear sweep voltammetry (LSV) were conducted using a standard three electrode cell with a 0.1 M KCl solution containing 0.001 M K<sub>3</sub>Fe (CN)<sub>6</sub> and 0.001 M K<sub>4</sub>Fe (CN)<sub>6</sub> as the electrolyte (pH = 6.43), platinum as the counter electrode, saturated calomel electrode as the reference electrode, and the sample deposited onto ITO glass as the working electrode. Photoluminescence (PL) spectra were obtained using an FLSP920 Edinburgh fluorescence spectrometer. UV-vis diffuse

reflectance spectra (UV-vis DRS) were recorded on a Cary 500 spectrometer.

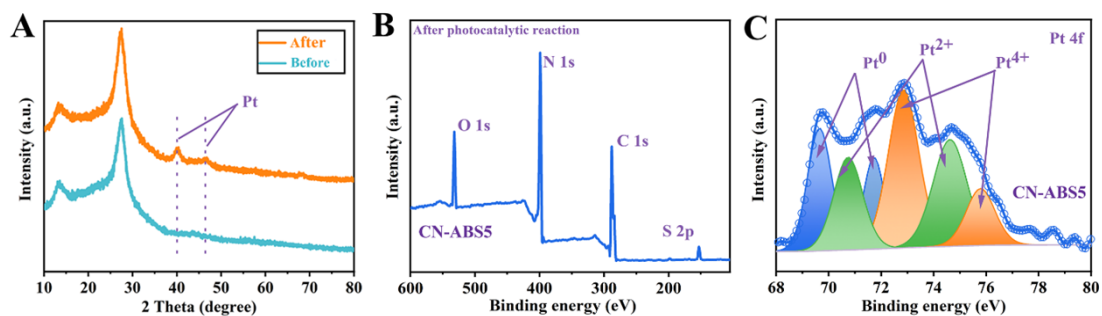

**Figure S1.** (A) XRD spectra, (B) XPS survey spectra and (C) the corresponding high-resolution XPS pattern of CN-ABS5 sample after photocatalytic reaction.

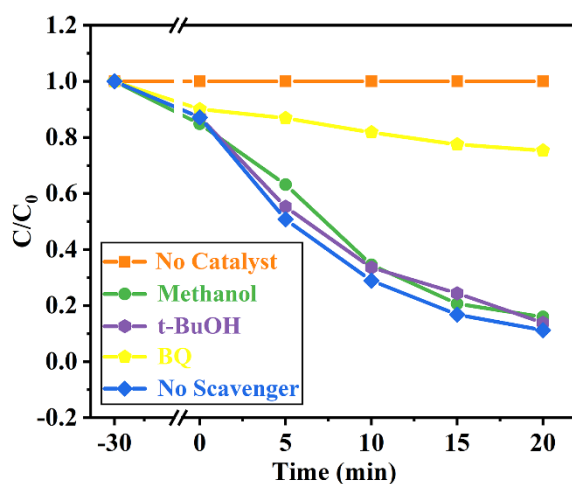

**Figure S2.** The trapping experiment of Reactive red 2 by using CN-ABS5 photocatalyst.

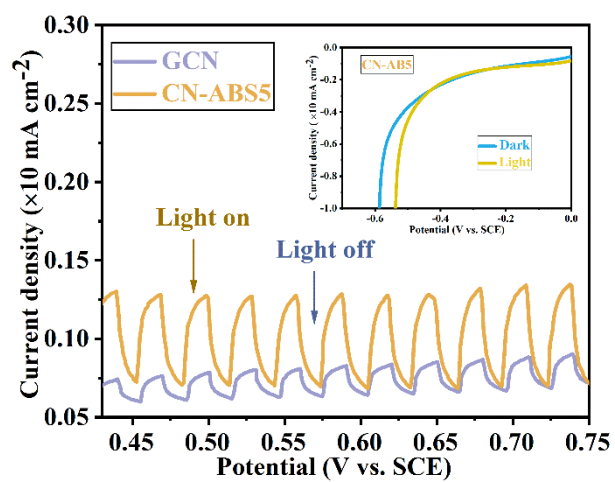

**Figure S3.** Current-potential curves of the electrodes in the dark and under illumination with a scan rate of  $2 \text{ mV s}^{-1}$ .
